# Supplementary material for: Do Pet Cats Deserve the Disproportionate Blame for Wildlife Predation Compared to Pet Dogs?
Source: Frontiers journal article supplement (doi:10.3389/fvets.2021.731689), 2021-10-25
Supplement: Table_1.pdf [file Table_1.pdf]

## Supplementary Material

**Table S1: Questionnaire**

|                                                                                                                                                                                                                                                                 |                                                                                                                                                                                                  |                                         |                                           |                                                                                                   |                                           |
|-----------------------------------------------------------------------------------------------------------------------------------------------------------------------------------------------------------------------------------------------------------------|--------------------------------------------------------------------------------------------------------------------------------------------------------------------------------------------------|-----------------------------------------|-------------------------------------------|---------------------------------------------------------------------------------------------------|-------------------------------------------|
| 1. Which age group do you belong to? <input type="checkbox"/> 18 – 24 <input type="checkbox"/> 25 – 34 <input type="checkbox"/> 35 – 44 <input type="checkbox"/> 45 – 54 <input type="checkbox"/> 55+                                                           |                                                                                                                                                                                                  |                                         |                                           |                                                                                                   |                                           |
| 2. What is your gender? <input type="checkbox"/> Male <input type="checkbox"/> Female                                                                                                                                                                           |                                                                                                                                                                                                  |                                         |                                           |                                                                                                   |                                           |
| 3. In what country do you currently reside?                                                                                                                                                                                                                     |                                                                                                                                                                                                  |                                         |                                           |                                                                                                   |                                           |
| 4. What is your postcode?                                                                                                                                                                                                                                       |                                                                                                                                                                                                  |                                         |                                           |                                                                                                   |                                           |
| 5. Which of the following best describes your residence? <input type="checkbox"/> Residence without garden <input type="checkbox"/> Residence with garden <input type="checkbox"/> Farm, acreage or semi-rural <input type="checkbox"/> Other (please describe) |                                                                                                                                                                                                  |                                         |                                           |                                                                                                   |                                           |
| <b>Dogs:</b>                                                                                                                                                                                                                                                    |                                                                                                                                                                                                  |                                         |                                           |                                                                                                   |                                           |
| 6. How many dogs do you own?                                                                                                                                                                                                                                    |                                                                                                                                                                                                  |                                         |                                           |                                                                                                   |                                           |
| 7. To the best of your knowledge, has this dog caught any prey in the last 6 months?                                                                                                                                                                            |                                                                                                                                                                                                  |                                         |                                           |                                                                                                   |                                           |
| 8. In the past month, how many times have you noticed this dog hunt?                                                                                                                                                                                            |                                                                                                                                                                                                  |                                         |                                           |                                                                                                   |                                           |
| 9. Please use the following table to provide details about each sort of animals your dog(s) caught in the last 6 months (If your dog(s) has not caught any animals in the last 6 months, please proceed to the next page)                                       |                                                                                                                                                                                                  |                                         |                                           |                                                                                                   |                                           |
|                                                                                                                                                                                                                                                                 | <b>Type of animal caught</b>                                                                                                                                                                     | <b>Number caught in the last month</b>  | <b>Number caught in the last 6 months</b> | <b>Please specify which of your dogs caught this/ these animals, if known</b>                     | <b>Is this animal a native species</b>    |
| Animal 1                                                                                                                                                                                                                                                        | Dropdown list:<br>Rodent, for example rat or mouse; Other mammal, for example possum, koala, wallaby; Reptile or amphibian, for example snake, lizard, frog, toad<br>Bird; Other; Unrecognisable | Dropdown list with numbers from 0 to 9+ | Dropdown list with numbers from 1 to 9+   | Dropdown list:<br>Dog 1<br>Dog 2<br>Don't know<br>More than one of my dogs has caught this animal | Dropdown list:<br>Yes<br>No<br>Don't know |
| Animal 2                                                                                                                                                                                                                                                        |                                                                                                                                                                                                  |                                         |                                           |                                                                                                   |                                           |
| Animal 3...                                                                                                                                                                                                                                                     |                                                                                                                                                                                                  |                                         |                                           |                                                                                                   |                                           |
| <b>Cats:</b>                                                                                                                                                                                                                                                    |                                                                                                                                                                                                  |                                         |                                           |                                                                                                   |                                           |
| 10. How many cats do you own?                                                                                                                                                                                                                                   |                                                                                                                                                                                                  |                                         |                                           |                                                                                                   |                                           |
| 11. To the best of your knowledge, has this cat caught any prey in the last 6 months? Yes/ No                                                                                                                                                                   |                                                                                                                                                                                                  |                                         |                                           |                                                                                                   |                                           |
| 12. In the past month, how many times have you noticed this cat hunt?                                                                                                                                                                                           |                                                                                                                                                                                                  |                                         |                                           |                                                                                                   |                                           |
| 13. Please complete the following table for each of your cats:                                                                                                                                                                                                  |                                                                                                                                                                                                  |                                         |                                           |                                                                                                   |                                           |
| 14. Please use the following table to provide details about each sort of animals your cat(s) caught in the last 6 months (If your cat(s) has not caught any animals in the last 6 months, please proceed to the next page)                                      |                                                                                                                                                                                                  |                                         |                                           |                                                                                                   |                                           |
|                                                                                                                                                                                                                                                                 | <b>Type of animal caught</b>                                                                                                                                                                     | <b>Number caught in the last month</b>  | <b>Number caught in the last 6 months</b> | <b>Please specify which of your cats caught this/ these animals, if known</b>                     | <b>Is this animal a native species</b>    |
| Animal 1                                                                                                                                                                                                                                                        | Dropdown list:<br>Rodent, for example rat or mouse; Other mammal, for example possum, koala, wallaby; Reptile or amphibian, for example snake, lizard, frog, toad<br>Bird; Other; Unrecognisable | Dropdown list with numbers from 0 to 9+ | Dropdown list with numbers from 1 to 9+   | Dropdown list:<br>Cat 1<br>Cat 2<br>Don't know<br>More than one of my cats has caught this animal | Dropdown list:<br>Yes<br>No<br>Don't know |
| Animal 2                                                                                                                                                                                                                                                        |                                                                                                                                                                                                  |                                         |                                           |                                                                                                   |                                           |
| Animal 3..                                                                                                                                                                                                                                                      |                                                                                                                                                                                                  |                                         |                                           |                                                                                                   |                                           |
